# Supplementary material for: Conspicuous carotenoid-based pelvic spine ornament in three-spined stickleback populations—occurrence and inheritance
Source: PeerJ journal article supplement (doi:10.7717/peerj.872), 2015-04-02
Supplement: Appendix4.pdf [file Appendix4.pdf]

| Source                      | SS     | d.f | <i>F</i> | <i>P</i> -value |
|-----------------------------|--------|-----|----------|-----------------|
| <u>Analysis of variance</u> |        |     |          |                 |
| Offsprings' sex             | 0.008  | 2   | 10.541   | < 0.001         |
| Length                      | 0.017  | 1   | 46.300   | <0.001          |
| Mothers' $I_R$              | 0.002  | 1   | 6.676    | 0.010           |
| Father's $I_R$              | <0.001 | 1   | 0.120    | 0.730           |
| Error                       | 0.107  | 286 |          |                 |
| Total                       | 46.899 | 292 |          |                 |
