# Supplementary material for: Conspicuous carotenoid-based pelvic spine ornament in three-spined stickleback populations—occurrence and inheritance
Source: PeerJ. 2015 Apr 2;3:e872. doi: 10.7717/peerj.872 (PMC4389276; doi:10.7717/peerj.872)
Supplement: Data S2 — This data-set was used when making Table 4, Fig. 6 and Appendices S2, S4 and S5. [file peerj-03-872-s007.xlsx]

## Sheet: Ark1
This data-set was used when making Table 4, Figure 6, Appendix 2, Appendix 4, and Appendix 5
Tank: code for the rearing tank for each family-group
Fishnumber: a number from 1 onwards within each family-group
OffspringIR: Intensity of red (IR) for each fish
Length of offspring (m m)
Sex of offspring: females ("1"), males ("2"), and immature ("0")
Fathers' IR: Intensity of red (IR) of the fathers
Mothers' IR: Intensity of red (IR) of mothers
Tank	Fishnumber	OffspringIR	Length	Sex	Fathers' IR	Mothers' IR
102	1	0.384739	35	0	0.413329	0.358034
102	2	0.408626	55	1	0.413329	0.358034
102	3	0.407559	53	1	0.413329	0.358034
102	4	0.43057	49	2	0.413329	0.358034
102	5	0.409254	53	1	0.413329	0.358034
102	6	0.433095	51	2	0.413329	0.358034
102	7	0.374132	49	1	0.413329	0.358034
102	8	0.387474	38	1	0.413329	0.358034
102	9	0.394059	52	1	0.413329	0.358034
102	10	0.447554	49	1	0.413329	0.358034
102	11	0.421686	54	1	0.413329	0.358034
102	12	0.400548	48	1	0.413329	0.358034
102	13	0.465249	50	2	0.413329	0.358034
102	14	0.402945	54	1	0.413329	0.358034
102	15	0.401875	37	2	0.413329	0.358034
102	16	0.384817	32	0	0.413329	0.358034
102	17	0.415837	48	2	0.413329	0.358034
102	18	0.397512	34	2	0.413329	0.358034
102	19	0.363107	35	0	0.413329	0.358034
102	20	0.412598	39	1	0.413329	0.358034
102	21	0.370473	34	0	0.413329	0.358034
102	22	0.403988	39	0	0.413329	0.358034
102	23	0.396654	32	0	0.413329	0.358034
102	24	0.406752	54	1	0.413329	0.358034
103	1	0.44884	50	2	0.378167	0.382154
103	2	0.396296	46	2	0.378167	0.382154
103	3	0.39788	48	1	0.378167	0.382154
103	4	0.412113	45	2	0.378167	0.382154
103	5	0.442106	52	2	0.378167	0.382154
103	6	0.396872	49	1	0.378167	0.382154
103	7	0.392687	46	1	0.378167	0.382154
103	8	0.417957	49	1	0.378167	0.382154
103	9	0.406541	47	1	0.378167	0.382154
103	10	0.411481	43	2	0.378167	0.382154
103	11	0.419623	52	1	0.378167	0.382154
103	12	0.384033	42	1	0.378167	0.382154
103	13	0.411997	56	1	0.378167	0.382154
103	14	0.427901	46	2	0.378167	0.382154
103	15	0.385751	49	2	0.378167	0.382154
103	17	0.398525	43	2	0.378167	0.382154
103	18	0.398733	47	1	0.378167	0.382154
103	19	0.39184	47	2	0.378167	0.382154
103	1	0.390064	44	2	0.378167	0.382154
103	2	0.376075	45	1	0.378167	0.382154
103	3	0.4219	39	0	0.378167	0.382154
103	4	0.392565	45	1	0.378167	0.382154
103	5	0.342706	41	2	0.378167	0.382154
103	6	0.422443	47	1	0.378167	0.382154
103	7	0.40771	42	2	0.378167	0.382154
103	8	0.385833	46	1	0.378167	0.382154
103	9	0.400549	39	2	0.378167	0.382154
103	10	0.39314	39	0	0.378167	0.382154
103	11	0.382024	38	0	0.378167	0.382154
103	12	0.388889	45	1	0.378167	0.382154
103	13	0.385795	34	0	0.378167	0.382154
103	14	0.403106	34	1	0.378167	0.382154
103	15	0.39722	38	2	0.378167	0.382154
103	16	0.448217	47	2	0.378167	0.382154
103	17	0.384418	35	0	0.378167	0.382154
103	18	0.386979	35	0	0.378167	0.382154
107	1	0.408927	34	0	0.406447	0.379412
107	2	0.374524	35	2	0.406447	0.379412
107	3	0.422449	46	2	0.406447	0.379412
107	4	0.39242	39	2	0.406447	0.379412
107	5	0.409015	44	1	0.406447	0.379412
108	1	0.458779	53	1	0.371341	0.388349
108	2	0.389427	53	1	0.371341	0.388349
108	3	0.42868	50	2	0.371341	0.388349
108	4	0.385189	61	1	0.371341	0.388349
108	5	0.441565	52	1	0.371341	0.388349
108	6	0.421154	49	1	0.371341	0.388349
108	7	0.43631	56	1	0.371341	0.388349
108	8	0.419741	57	2	0.371341	0.388349
108	9	0.426989	50	1	0.371341	0.388349
108	10	0.41017	46	2	0.371341	0.388349
108	11	0.436502	53	2	0.371341	0.388349
108	12	0.397111	52	1	0.371341	0.388349
108	13	0.414967	48	2	0.371341	0.388349
108	14	0.395303	54	1	0.371341	0.388349
108	15	0.415159	55	2	0.371341	0.388349
108	16	0.435526	53	2	0.371341	0.388349
108	17	0.440145	51	2	0.371341	0.388349
108	1	0.394148	55	1	0.371341	0.388349
108	2	0.437862	56	1	0.371341	0.388349
108	3	0.397895	53	1	0.371341	0.388349
108	4	0.419206	52	1	0.371341	0.388349
108	5	0.405549	48	2	0.371341	0.388349
108	6	0.406055	50	1	0.371341	0.388349
108	7	0.406955	54	1	0.371341	0.388349
108	8	0.454491	60	1	0.371341	0.388349
108	9	0.421435	52	1	0.371341	0.388349
108	10	0.456784	44	2	0.371341	0.388349
108	11	0.436538	50	1	0.371341	0.388349
108	12	0.443042	52	1	0.371341	0.388349
108	13	0.393084	38	2	0.371341	0.388349
108	14	0.434361	46	2	0.371341	0.388349
108	15	0.401554	56	1	0.371341	0.388349
108	16	0.429514	52	1	0.371341	0.388349
108	17	0.421896	45	1	0.371341	0.388349
108	18	0.438742	43	2	0.371341	0.388349
108	19	0.402227	48	2	0.371341	0.388349
109	1	0.403777	35	0	0.379898	0.355426
109	2	0.39188	38	0	0.379898	0.355426
109	3	0.375661	45	2	0.379898	0.355426
109	4	0.389247	38	0	0.379898	0.355426
109	5	0.416707	49	2	0.379898	0.355426
109	6	0.379098	45	2	0.379898	0.355426
109	7	0.403028	36	0	0.379898	0.355426
109	8	0.394596	43	1	0.379898	0.355426
109	9	0.392639	43	1	0.379898	0.355426
109	10	0.375088	38	0	0.379898	0.355426
109	11	0.384832	45	1	0.379898	0.355426
109	12	0.385233	43	2	0.379898	0.355426
109	1	0.412668	55	1	0.379898	0.355426
109	2	0.378748	48	1	0.379898	0.355426
109	3	0.386886	52	1	0.379898	0.355426
109	4	0.413643	49	2	0.379898	0.355426
109	5	0.376706	46	1	0.379898	0.355426
109	6	0.410421	48	2	0.379898	0.355426
109	7	0.393463	49	1	0.379898	0.355426
109	8	0.395614	51	2	0.379898	0.355426
109	9	0.39621	47	2	0.379898	0.355426
109	10	0.402498	47	2	0.379898	0.355426
109	11	0.431973	45	2	0.379898	0.355426
109	12	0.427566	51	2	0.379898	0.355426
109	13	0.411126	52	1	0.379898	0.355426
109	14	0.381453	45	2	0.379898	0.355426
109	15	0.390965	58	1	0.379898	0.355426
109	16	0.389149	50	1	0.379898	0.355426
109	17	0.371057	42	2	0.379898	0.355426
109	18	0.394948	47	2	0.379898	0.355426
109	19	0.384547	48	1	0.379898	0.355426
112	1	0.406301	59	1	0.385509	0.407704
112	2	0.451284	51	2	0.385509	0.407704
112	3	0.438909	60	1	0.385509	0.407704
112	5	0.388083	57	1	0.385509	0.407704
112	6	0.380788	37	0	0.385509	0.407704
112	7	0.420379	49	2	0.385509	0.407704
112	8	0.428497	42	2	0.385509	0.407704
112	9	0.411187	29	0	0.385509	0.407704
112	10	0.397311	35	0	0.385509	0.407704
112	11	0.400549	32	0	0.385509	0.407704
112	12	0.392509	32	2	0.385509	0.407704
112	13	0.433676	39	2	0.385509	0.407704
112	14	0.459663	52	2	0.385509	0.407704
112	14	0.402004	43	2	0.385509	0.407704
112	16	0.379164	42	1	0.385509	0.407704
112	17	0.410307	43	2	0.385509	0.407704
112	18	0.407528	49	2	0.385509	0.407704
113	1	0.393755	48	2	0.383346	0.384773
113	2	0.386458	50	1	0.383346	0.384773
113	3	0.385155	36	1	0.383346	0.384773
113	4	0.38393	50	1	0.383346	0.384773
113	5	0.385885	50	1	0.383346	0.384773
113	6	0.382961	47	2	0.383346	0.384773
113	7	0.379191	40	1	0.383346	0.384773
113	8	0.402781	49	1	0.383346	0.384773
114	1	0.374875	30	0	0.370159	0.355333
114	2	0.382559	30	0	0.370159	0.355333
114	3	0.405666	37	0	0.370159	0.355333
114	4	0.390192	36	1	0.370159	0.355333
114	5	0.416171	48	2	0.370159	0.355333
114	6	0.414055	40	1	0.370159	0.355333
114	7	0.407014	33	0	0.370159	0.355333
114	8	0.439728	48	2	0.370159	0.355333
114	9	0.438564	46	2	0.370159	0.355333
114	10	0.368578	34	0	0.370159	0.355333
114	11	0.393917	41	1	0.370159	0.355333
114	12	0.429453	46	2	0.370159	0.355333
114	13	0.418527	49	1	0.370159	0.355333
114	14	0.432586	50	1	0.370159	0.355333
114	15	0.40419	45	2	0.370159	0.355333
114	16	0.384255	32	0	0.370159	0.355333
114	17	0.406453	49	1	0.370159	0.355333
114	18	0.392907	43	1	0.370159	0.355333
114	19	0.405285	42	2	0.370159	0.355333
114	20	0.360987	34	0	0.370159	0.355333
114	21	0.407541	54	1	0.370159	0.355333
114	22	0.359519	35	0	0.370159	0.355333
114	23	0.390684	47	1	0.370159	0.355333
114	24	0.409855	42	1	0.370159	0.355333
114	25	0.380678	38	2	0.370159	0.355333
114	26	0.381652	38	2	0.370159	0.355333
114	27	0.425495	44	2	0.370159	0.355333
114	28	0.413516	35	0	0.370159	0.355333
114	29	0.388792	45	1	0.370159	0.355333
114	30	0.395888	36	2	0.370159	0.355333
114	31	0.406642	33	0	0.370159	0.355333
118	1	0.435522	51	1	0.412808	0.381898
118	2	0.401414	45	1	0.412808	0.381898
118	3	0.418797	55	2	0.412808	0.381898
118	4	0.406415	47	1	0.412808	0.381898
118	5	0.376017	37	1	0.412808	0.381898
118	6	0.411925	50	2	0.412808	0.381898
118	7	0.417834	46	1	0.412808	0.381898
118	8	0.385583	47	1	0.412808	0.381898
118	9	0.388903	52	2	0.412808	0.381898
118	10	0.424803	45	2	0.412808	0.381898
118	11	0.408951	46	1	0.412808	0.381898
118	12	0.402355	42	2	0.412808	0.381898
118	13	0.361486	38	1	0.412808	0.381898
118	14	0.428875	46	2	0.412808	0.381898
118	15	0.409206	46	1	0.412808	0.381898
118	16	0.41158	49	1	0.412808	0.381898
124	1	0.408694	47	1	0.365246	0.372704
124	2	0.397007	45	1	0.365246	0.372704
124	3	0.359305	46	2	0.365246	0.372704
124	4	0.418775	43	2	0.365246	0.372704
124	5	0.423321	43	1	0.365246	0.372704
124	6	0.388214	32	0	0.365246	0.372704
124	7	0.375036	38	1	0.365246	0.372704
124	8	0.382655	33	0	0.365246	0.372704
126	1	0.375927	38	0	0.360713	0.350265
126	2	0.381713	49	1	0.360713	0.350265
126	3	0.393632	50	1	0.360713	0.350265
126	4	0.378551	38	2	0.360713	0.350265
126	5	0.375801	39	1	0.360713	0.350265
126	6	0.373338	39	1	0.360713	0.350265
126	7	0.376531	37	0	0.360713	0.350265
126	8	0.383671	40	0	0.360713	0.350265
126	9	0.384724	36	1	0.360713	0.350265
126	10	0.364009	35	0	0.360713	0.350265
126	11	0.388447	50	1	0.360713	0.350265
126	12	0.404092	41	2	0.360713	0.350265
126	13	0.369054	50	1	0.360713	0.350265
126	14	0.351519	39	0	0.360713	0.350265
126	15	0.407304	49	1	0.360713	0.350265
126	16	0.403316	38	1	0.360713	0.350265
126	17	0.390126	44	1	0.360713	0.350265
126	18	0.374433	45	1	0.360713	0.350265
126	19	0.339052	30	0	0.360713	0.350265
126	20	0.332712	38	0	0.360713	0.350265
126	21	0.397186	44	2	0.360713	0.350265
126	22	0.390317	50	2	0.360713	0.350265
127	1	0.395311	30	0	0.354913	0.329346
127	2	0.366775	35	1	0.354913	0.329346
127	3	0.405606	36	2	0.354913	0.329346
127	4	0.377938	41	1	0.354913	0.329346
127	5	0.396208	35	0	0.354913	0.329346
130	1	0.419307	48	1	0.37332	0.394964
130	2	0.406863	38	2	0.37332	0.394964
130	3	0.403736	57	1	0.37332	0.394964
130	4	0.394832	40	1	0.37332	0.394964
130	5	0.415406	56	1	0.37332	0.394964
130	6	0.403684	49	1	0.37332	0.394964
130	7	0.375915	41	1	0.37332	0.394964
130	8	0.423839	57	1	0.37332	0.394964
130	9	0.405885	52	1	0.37332	0.394964
130	10	0.422315	49	2	0.37332	0.394964
130	11	0.397015	50	1	0.37332	0.394964
130	12	0.450172	53	1	0.37332	0.394964
130	13	0.417626	50	2	0.37332	0.394964
130	14	0.401087	43	1	0.37332	0.394964
130	15	0.382834	41	1	0.37332	0.394964
130	16	0.384914	37	1	0.37332	0.394964
130	17	0.431421	52	1	0.37332	0.394964
130	18	0.41901	50	2	0.37332	0.394964
130	19	0.421422	41	2	0.37332	0.394964
130	20	0.425703	50	1	0.37332	0.394964
133	1	0.333199	34	0	0.392268	0.383497
133	2	0.368808	55	1	0.392268	0.383497
133	3	0.430474	57	1	0.392268	0.383497
133	4	0.369642	35	0	0.392268	0.383497
133	5	0.387358	33	0	0.392268	0.383497
133	6	0.358741	38	2	0.392268	0.383497
133	7	0.396067	56	1	0.392268	0.383497
133	8	0.400717	52	1	0.392268	0.383497
133	9	0.3605	33	2	0.392268	0.383497
133	10	0.404677	45	1	0.392268	0.383497
133	11	0.388576	38	2	0.392268	0.383497
133	12	0.380791	36	0	0.392268	0.383497
133	13	0.378997	35	0	0.392268	0.383497
133	14	0.358452	39	0	0.392268	0.383497
133	15	0.399434	44	2	0.392268	0.383497
133	16	0.374918	48	1	0.392268	0.383497
133	17	0.334315	34	0	0.392268	0.383497
133	18	0.366503	42	0	0.392268	0.383497
133	19	0.346659	38	0	0.392268	0.383497
133	20	0.361307	35	0	0.392268	0.383497
133	21	0.398411	40	2	0.392268	0.383497
134	1	0.391875	38	1	0.403547	0.379459
134	2	0.389527	43	2	0.403547	0.379459
134	3	0.403507	43	2	0.403547	0.379459
134	4	0.383762	40	1	0.403547	0.379459
134	5	0.384028	40	1	0.403547	0.379459
134	6	0.400399	47	2	0.403547	0.379459
134	7	0.409604	40	2	0.403547	0.379459
134	8	0.397421	45	2	0.403547	0.379459
134	9	0.387343	48	2	0.403547	0.379459
134	10	0.373256	35	0	0.403547	0.379459
134	11	0.371203	31	0	0.403547	0.379459
134	12	0.403833	52	2	0.403547	0.379459
