# Supplementary material for: Conspicuous carotenoid-based pelvic spine ornament in three-spined stickleback populations—occurrence and inheritance
Source: PeerJ. 2015 Apr 2;3:e872. doi: 10.7717/peerj.872 (PMC4389276; doi:10.7717/peerj.872)
Supplement: Data S3 — This data-set was used when preparing Table 3 and Fig. 5. [file peerj-03-872-s008.xlsx]

## Sheet: Ark1
This data-set was used when preparing Table 3 and Fig. 5.
Season: whether the fish were sampled 23 May ("1") or 7 October ("2")
Fish number: individual number for each fish
Length in cm
Weight: wet weight of fish (data from May is not used here, since the May-data included weight of large female gonads)
Sex: females ("1") and males ("2")
Season	Length	Weight	Sex	Intensity of red (IR)
2	5.4	1.4	2	0.378
2	5.1	1.3	2	0.43
2	4.5	0.735	2	0.389
2	5.5	1.277	2	0.428
2	5.5	1.357	2	0.407
2	6	1.765	2	0.391
2	5.6	1.368	2	0.397
2	5.4	1.483	1	0.407
2	5.5	1.437	2	0.411
2	6.2	1.82	1	0.366
2	6.8	2.552	2	0.384
2	7.2	3.068	1	0.391
2	5.8	1.357	1	0.362
2	6	1.553	1	0.372
2	5.3	1.09	1	0.37
2	5.3	1.297	2	0.407
2	5.2	1.245	2	0.361
2	6.2	2.175	1	0.413
2	6.3	2.3	1	0.421
2	6.2	1.852	1	0.409
2	5.4	1.343	1	0.386
2	6.4	2.456	1	0.376
2	6.6	2.268	1	0.384
2	6.7	2.53	1	0.376
2	6.9	2.504	1	0.403
2	6.4	2.155	1	0.377
2	5.6	1.303	2	0.409
2	6	1.871	1	0.391
2	6.2	1.795	1	0.401
2	6	1.784	2	0.408
2	6.4	1.788	1	0.371
2	4	0.52	1	0.392
2	5.4	1.256	1	0.394
2	5.6	1.347	1	0.397
2	5.7	1.384	1	0.39
2	5.5	1.558	2	0.379
2	5.2	1.13	1	0.383
2	5.2	1.035	2	0.389
2	5.1	0.926	1	0.36
2	6.1	2.215	1	0.372
2	5.9	1.77	1	0.416
2	5	0.851	2	0.383
2	5.8	1.484	2	0.371
2	5.9	1.619	1	0.362
2	6.6	2.46	1	0.389
2	6.4	2.115	1	0.379
1	4.7	0.784	1
1	4.6	0.91	1
1	4.7	0.834	1
1	4.7	1.112	1
1	5.4	1.303	2
1	4.7	1.008	2
1	5.1	1.268	2
1	4.9	1.04	1
1	5	1.471	1
1	5.9	2.146	2
1	7	3.906	1
1	4.8	0.76	1
1	5.1	0.893	1
1	4.7	0.788	1
1	4.4	0.784	1
1	5.2	0.959	1
1	5.1	1.466	2
1	4.7	1.036	1
1	5.1	1.174	1
1	5.4	1.384	2
1	5.4	1.37	2
1	5.3	1.21	2
1	5.3	1.193	2
1	6.1	2.133	2
1	5.1	0.908	1
1	4.8	0.935	2
1	5.3	1.377	1
1	5	1.071	1
1	5.2	1.279	1
1	5.7	1.755	2
1	4.6	0.984	1
1	5.1	1.122	2
1	5.5	1.389	1
1	6.1	1.801	2
1	6.2	2.382	2
1	4.5	0.758	2
1	4.8	1.007	2
1	5.1	0.969	1
1	4.9	1.081	1
1	4.4	0.755	1
1	4.8	0.803	1
1	6	2.059	2
1	5.7	1.561	1
1	5.1	1.46	1
1	5.6	1.447	2
1	6.4	2.765	2
1	5	0.829	1
1	4.6	0.987	2
1	5.1	1.342	2
1	5	1.011	1
1	5.3	1.211	2
1	4.8	0.961	1
1	4.9	1.129	2
1	4.5	0.72	2
1	5.5	1.446	1
1	5	1.184	2
1	5.2	1.173	1
1	5.2	1.373	2
1	5.2	1.286	2
1	5.1	1.25	2
1	5.9	2.023	2
1	5.6	1.781	1
