# Supplementary material for: Conspicuous carotenoid-based pelvic spine ornament in three-spined stickleback populations—occurrence and inheritance
Source: PubMed Central journal article supplement (PMC4389276; doi:10.7717/peerj.872), 2015-04-02

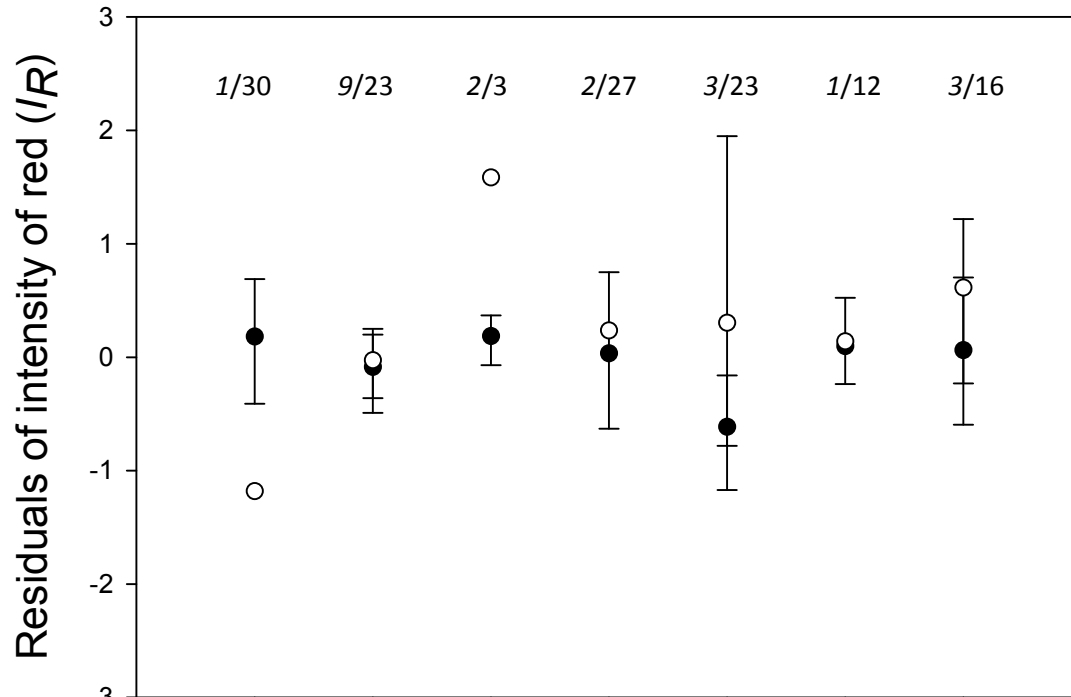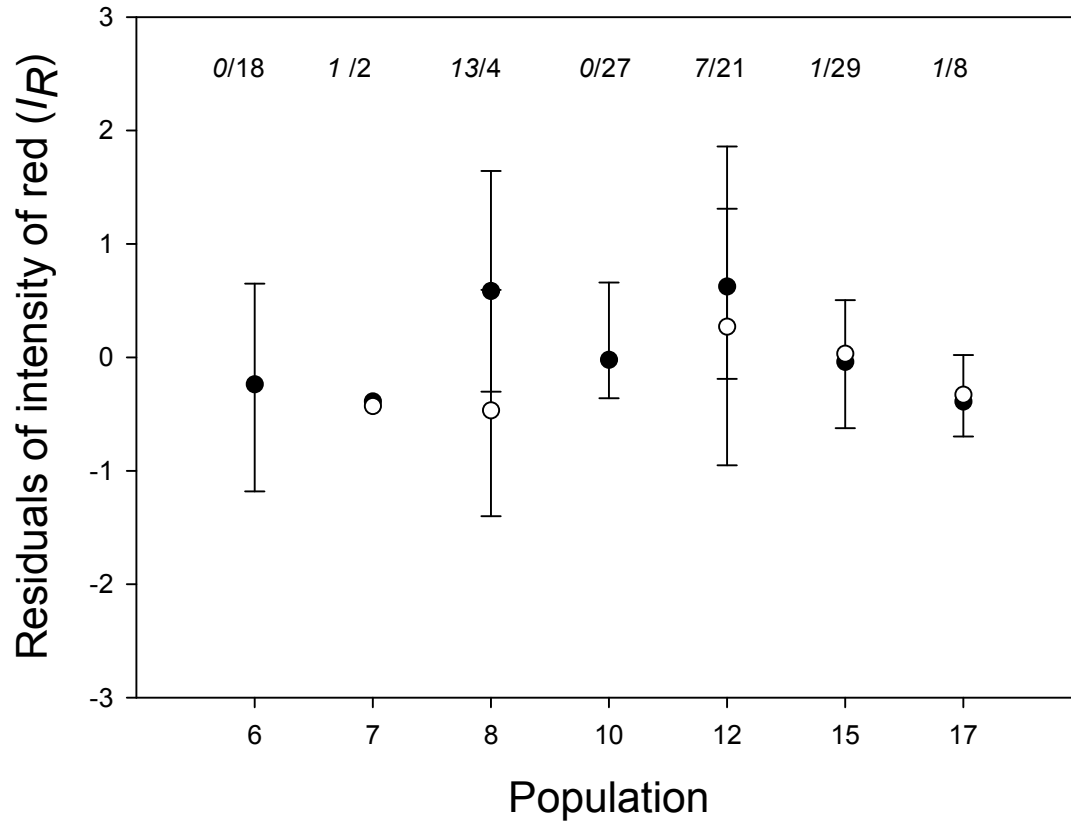

Supplement: peerj-03-872-s003.pdf [file peerj-03-872-s003.pdf]
