# Supplementary material for: Conspicuous carotenoid-based pelvic spine ornament in three-spined stickleback populations—occurrence and inheritance
Source: PubMed Central journal article supplement (PMC4389276; doi:10.7717/peerj.872), 2015-04-02
Supplement: peerj-03-872-s005.pdf [file peerj-03-872-s005.pdf]

| Source                        | SS                      | d.f      | <i>F</i> | <i>P</i> -value |
|-------------------------------|-------------------------|----------|----------|-----------------|
| <u>Analysis of variance</u>   |                         |          |          |                 |
| Length                        | 0.011                   | 1        | 26.914   | <0.001          |
| Mothers' <i>I<sub>R</sub></i> | 0.001                   | 1        | 3.245    | 0.075           |
| Fathers' <i>I<sub>R</sub></i> | 3.05 × 10 <sup>-5</sup> | 1        | 0.075    | 0.785           |
| Error                         | 0.040                   | 99       |          |                 |
| Total                         | 17.231                  | 103      |          |                 |
| Term                          | Coeff.                  | SE Coef. | <i>t</i> | <i>P</i> -value |
| <u>Coefficients</u>           |                         |          |          |                 |
| Constant                      | 0.252                   | 0.0638   | 3.950    | 0.001           |
| Length                        | 0.002                   | <0.001   | 5.216    | <0.001          |
| Mothers' <i>I<sub>R</sub></i> | 0.208                   | 0.116    | 1.790    | 0.075           |
| Fathers' <i>I<sub>R</sub></i> | -0.036                  | 0.132    | -0,273   | 0.785           |
